# Supplementary material
Source: PubMed Central journal article supplement (PMC5886172)
Supplement: supplementary_figure_1_ddx418.pdf [file supplementary_figure_1_ddx418.pdf]

## Sheng\_Supplementary Figure S1

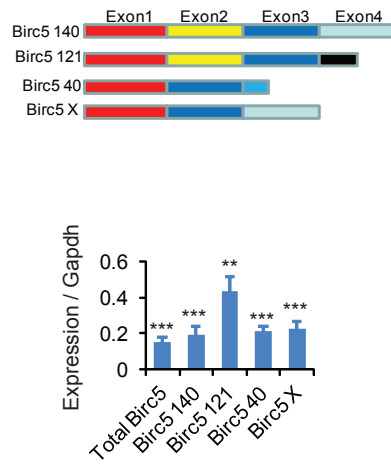

Figure S1 *Birc5* Alternative Splicing Is Not Altered in the Heart of SMA Mice. Heterozygous mice were used as controls. Heart RNA samples from P2 were analyzed with real-time RT-PCR and four isoform-specific primer pairs. All isoforms were similarly downregulated in SMA mice compared to heterozygous mice. *Birc5 X* is a novel isoform that we identified in the mouse heart.
