# Supplementary material
Source: PubMed Central journal article supplement (PMC5886172)
Supplement: supplementary_figure_2_ddx418.pdf [file supplementary_figure_2_ddx418.pdf]

Sheng\_Supplementary  
Figure S2

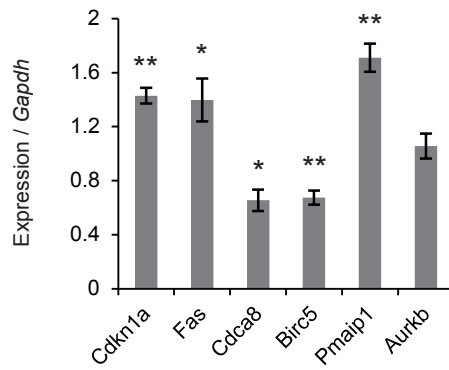

Figure S2 Analysis of Gene Expression Changes in SMN-depleted Mouse Primary Cardiomyocytes. Cardiomyocytes were isolated from P2 heterozygous mice; mouse SMN was efficiently knocked down with siRNA-2 (Fig. 6). Cells were collected 48 hrs post siRNA treatment, and cell cycle- and apoptosis- related genes were analyzed with quantitative PCR. Data were first normalized to *Gapdh* and then normalized to the control siRNA. \*  $P < 0.05$ , \*\*  $P < 0.01$ ,  $N = 3$ .
