# Supplementary material
Source: PubMed Central journal article supplement (PMC5886172)
Supplement: supplementary_table_2_ddx418.pdf [file supplementary_table_2_ddx418.pdf]

**Sheng\_Supplementary  
Table S2**

Table S2. All primers used in the study for quantitative RT-PCR

| Gene        | Forward primer (from 5' to 3') | Reverse primer (from 5' to 3') |
|-------------|--------------------------------|--------------------------------|
| Chek1       | CAGGGGTGGTTTATCTTCATGG         | GCCAAGCCAAAGTCAGAGAT           |
| Chek2       | AACTGATGGAAGGAGGAGAACTA        | AGCATCTGGTAGAAGTAGAGCT         |
| Cdca8       | TGACTACTTCGCCCTAGGAGG          | CTCCACCTCGATTACCTTTTCGC        |
| Bub1b       | CGAGTGAAGCCATGTGCCTG           | GCTCCCTGAAGTGTGGACAT           |
| Cenpn       | ACGTTACAGTCAGCTTCAGAG          | CTGGGGATAATACACCACGAAC         |
| Tipin       | AGGTGAGGAAAAGATGTTAGAGC        | CAGGATCTCTCTCTGGCGAG           |
| Spag5       | GGAGCTGAAGGAAAGATGCAAC         | GGCAAGCTTCTATGTGCGTTGAA        |
| Plk1        | CCGCAATCAGGTCATTCACAGG         | GCCAAGCCAAATCCCCTATT           |
| Cenpe       | CTTAGTCTGCAGCGGACAGG           | CCAAGTCTTCTTCTCTGCTGT          |
| Mki67       | GACCGCTCCTTTAGGTATGAAGA        | TCGCCTTGATGGTTCCTTTCC          |
| Kif4        | CTCAGGTGGTGGTTGGTAATGA         | ATGAGTGGAGCTACTGCTGTA          |
| Ccnb1       | CTCAGGGTCACTAGGAACACG          | CAAGAGCAGTTCTCGGTCTCAG         |
| Aurkb       | CAACAGCCAGTCCACAGC             | GGCTGCTTGTCTGGGATC             |
| Incenp      | GTCACAGTTACCTGGAGAGGC          | GCTCCTTCTGCTCCTCA              |
| Cenpa       | AGAAGGCTTAGGGAAGGC             | CACCTACACTGGAGCTCTGTC          |
| Ndc80       | GGCGAAGCTGAAGGACTTGAC          | TCCTCCTCCAGTCTTGCAATC          |
| P53         | GTCTACGTCCC GCCATAAAA          | AGGCAGTGAAGGGACTAGCA           |
| P21         | CCGCACAGGAGCAAAGTGT            | ACGAAGTCAAAGTTCCACCG           |
| Bax         | TGCAGAGGATGATTGCTGACG          | CAGGGCCTTGAGCACCAG             |
| Bcl-2       | CGCCTCTTACCTTTAGCA             | TTCCCCGTTGGCATGAGATG           |
| Noxa        | AACGCGGGCAGAGCTAC              | TTGCGACTTCCCAGGCATC            |
| Puma        | TCCAGACTGTGAATCCTGTGC          | GGTGGCTTCCGCCAATATCT           |
| Fas         | ACCAGACTTCTACTGCGATTC          | GTTTGTATTGCTGGTTGCTGT          |
| Casp3       | GAGCTTGAACGGTACGCTA            | TCCACTGACTTGCTCCCATG           |
| Cytc        | ACAAGAACAAGGCATCACCTGG         | CTCCCTTCTTCTAATTCCAGCG         |
| Gapdh       | CCGTAGACAAAATGGTGAAGGT         | CGTGAGTGGAGTCATACTGGAA         |
| Total Birc5 | ATCCTGCGTTTGAGTCGTCTT          | AGTTCTTGAAGGTGGCGATGC          |
| Birc5 140   | GAACCCGATGACAACCCGA            | GCTTGTGTTGGTCTCCTTTG           |
| Birc5 121   | TGGCAGAGAGTATTGGCTGAA          | CTGCATGGGAGCCACCTC             |
| Birc5 40    | CCTCAAGAACTACCGCATCG           | TATGCTCCTCTTCGCTCTGG           |
| Birc5 X     | CCAGAGCGAAGAGGAGCATAG          | TGTTGTTGGTCTCCTTTGCAA          |
| SMN2        | AAGTGAGAACTCCAGGTCTCCTG        | TCTGATCGTTTCTTTAGTGGC          |
